# Supplementary material for: Mechanical Property Changes in Breast Cancer Cells Induced by Stimulation with Macrophage Secretions in Vitro
Source: PubMed Central journal article supplement (PMC6915679; doi:10.3390/mi10110738), 2019-10-30
Supplement: micromachines-10-00738-s001.pdf [file micromachines-10-00738-s001.pdf]

# Supplementary Materials: Mechanical Property Changes in Breast Cancer Cells Induced by Stimulation with Macrophage Secretions in Vitro

Hyonchol Kim <sup>1,2,#,\*</sup>, Kenta Ishibashi <sup>1,2,#</sup>, Tomoko Okada <sup>1</sup> and Chikashi Nakamura <sup>1,2</sup>

<sup>1</sup> Biomedical Research Institute, National Institute of Advanced Industrial Science and Technology (AIST), 1-1-1 Higashi, Tsukuba, Ibaraki 305-8565, Japan; t.okada@aist.go.jp (T.O.); chikashinakamura@aist.go.jp (C.N.)

<sup>2</sup> Graduate School of Engineering, Tokyo University of Agriculture and Technology, 2-24-16 Nakamachi, Koganei, Tokyo 184-8588, Japan; s189320z@st.go.tuat.ac.jp (K.I.)

\* Correspondence: kim-hc@aist.go.jp; Tel.: +81-29-861-9392 (H.K.)

# These authors contributed equally to this work.

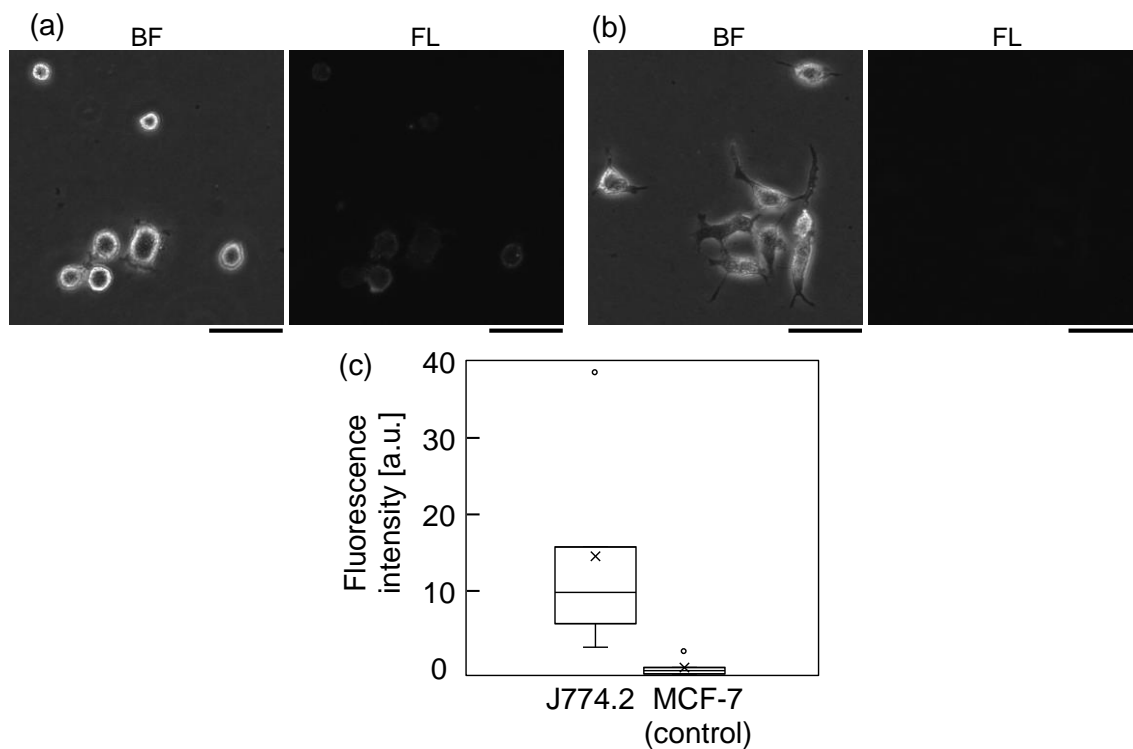

**Figure S1.** Images of PD-1 expression on J774.2 (a) and MCF-7 (b, negative control) cells. Bright field (BF, left) and fluorescence (FL, right) images are shown. Bars: 50  $\mu$ m. (c) Comparison of fluorescence intensities between J774.2 and MCF-7 cells.  $N = 62$  for J774.2 and  $N = 57$  for MCF-7.

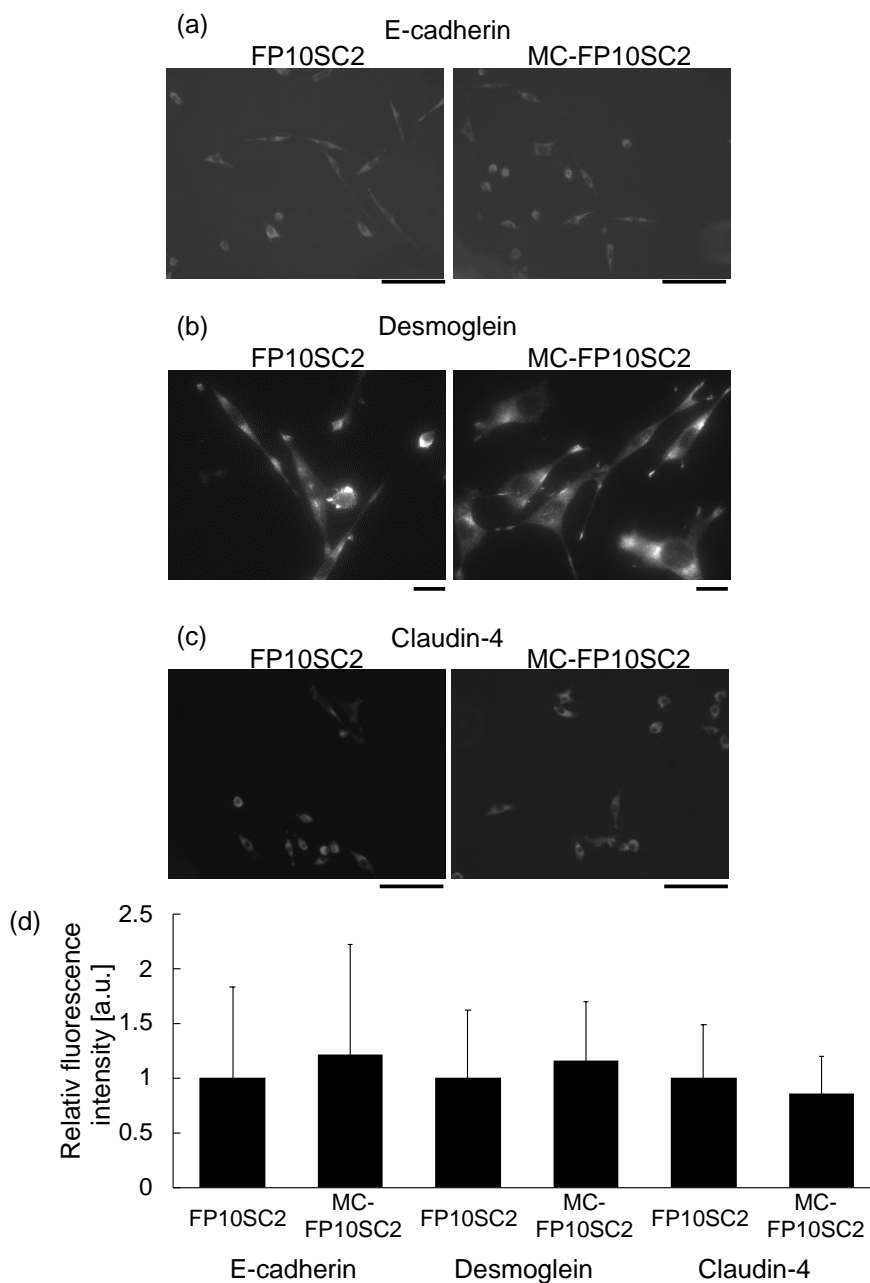

**Figure S2.** Images of E-cadherin (a), desmoglein (b), and claudin-4 (c) molecules on FP10SC2 (left) and MC-FP10SC2 (right) cells. Bars: 100  $\mu\text{m}$ . (d) Comparison of relative fluorescence intensities between FP10SC2 and MC-FP10SC2 cells for the three molecules. Values of FP10SC2 cells were used the standard for comparison.  $N = 38$  and  $N = 43$ ,  $N = 46$  and  $N = 52$ , and  $N = 109$  and  $N = 105$  for FP10SC2 and MC-FP10SC2 cells for E-cadherin, desmoglein, and claudin-4, respectively.

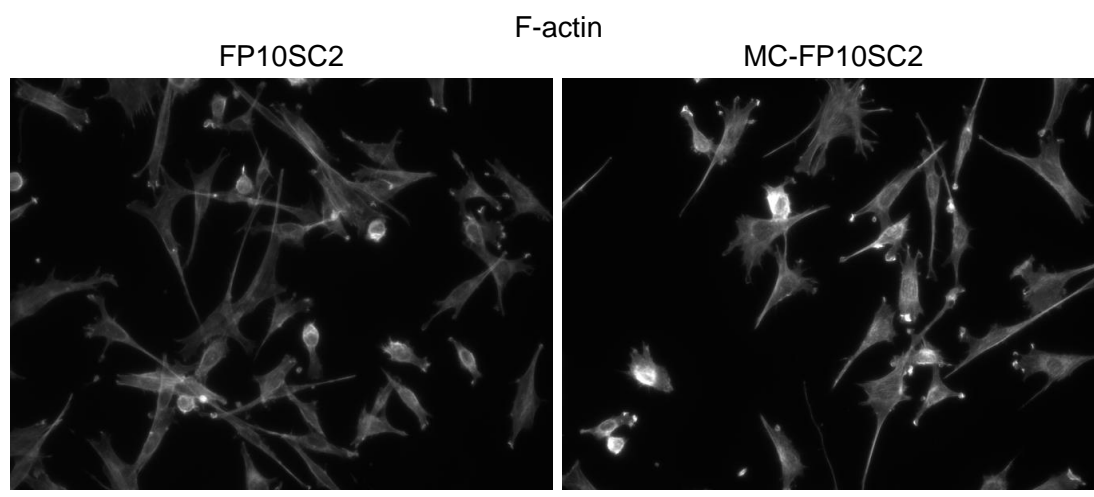

**Figure S3.** Images of F-actin on FP10SC2 (left) and MC-FP10SC2 (right) cells. Bars: 100  $\mu\text{m}$ .
